# Supplementary material for: Anion Binding Properties of Alkynylplatinum(II) Complexes with Amide-Functionalized Terpyridine: Host–Guest Interactions and Fluoride Ion-Induced Deprotonation
Source: PubMed Central journal article supplement — ChemistryOpen. 2014 Sep 4;3(5):172–6. doi: 10.1002/open.201402019 (PMC4234213; doi:10.1002/open.201402019), 2014-09-04
Supplement: open0003-0172-sd1.pdf [file open0003-0172-sd1.pdf]

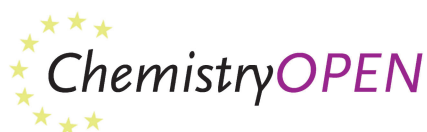

## Supporting Information

© 2014 The Authors. Published by Wiley-VCH Verlag GmbH & Co. KGaA, Weinheim

### **Anion Binding Properties of Alkynylplatinum(II) Complexes with Amide-Functionalized Terpyridine: Host-Guest Interactions and Fluoride Ion-Induced Deprotonation\*\***

Margaret Ching-Lam Yeung, Ben Wai-Kin Chu, and Vivian Wing-Wah Yam<sup>\*[a]</sup>

open\_201402019\_sm\_miscellaneous\_information.pdf

**Materials and reagents:** 2,2':6',2''-Terpyridine-3',5'-dicarboxylic acid was synthesized according to the literature procedure.<sup>[1]</sup> Tetra-*n*-butylammonium hexafluorophosphate was purchased from Apollo Scientific Ltd. and was recrystallized for three times from hot absolute ethanol and then dried under vacuum for 12 hours before use. Acetonitrile (99 + %, for spectroscopy) was purchased from Acros. Acetone (ACS spectrophotometric grade,  $\geq 99.5$  %) was purchased from Aldrich. All other reagents were of analytical grade and were used as received.

### Syntheses of terpyridine ligands

**2,2':6',2''-Terpyridine-3',5'-dicarboxylic acid phenylamide [tpy-(CONHPh)<sub>2</sub>]:** To 2,2':6',2''-terpyridine-3',5'-dicarboxylic acid (500 mg, 1.55 mmol) was added SOCl<sub>2</sub> (10 ml) and the resultant mixture was refluxed overnight with a CaCl<sub>2</sub> drying tube equipped at the opening of the condenser. The SOCl<sub>2</sub> was then removed by distillation and to the solid was added dry dichloromethane (20 ml) to give a yellow suspension. To this mixture was added dropwise a solution containing dry dichloromethane (20 ml), aniline (0.29 ml, 3.20 mmol) and dry triethylamine (0.5 ml) over 30 minutes at 0 °C and the mixture was then stirred overnight at room temperature. The resulting mixture was washed with saturated aqueous NaHCO<sub>3</sub> solution and dried over anhydrous MgSO<sub>4</sub>. After removal of solvent, recrystallization of the residue from dichloromethane-ethanol gave the pure product as a white solid. Yield: 320 mg (44 %). <sup>1</sup>H NMR (400 MHz, CDCl<sub>3</sub>, 298 K,  $\delta$ /ppm):  $\delta$  7.00-7.03 (t,  $J = 7.3$  Hz, 2H, -C<sub>6</sub>H<sub>5</sub>NH-), 7.15-7.18 (m, 6H, -C<sub>6</sub>H<sub>5</sub>NH-), 7.52-7.56 (dt,  $J = 1.4, 7.7$  Hz, 2H, terpyridyl H), 7.61-7.63 (d,  $J = 7.7$  Hz, 4H, terpyridyl H), 7.73 (s, 1H, terpyridyl H), 7.86-7.88 (d,  $J = 7.7$  Hz, 2H, terpyridyl H), 8.10 (br s, 2H, -C<sub>6</sub>H<sub>5</sub>NH-), 11.30 (br s, 2H, -C<sub>6</sub>H<sub>5</sub>NH-); positive-ion FAB-MS,  $m/z$ : 472 [M + H]<sup>+</sup>; elemental analysis calcd (%) for C<sub>29</sub>H<sub>21</sub>N<sub>5</sub>O<sub>2</sub>•EtOH: C 71.93, H 5.26, N 13.53; found: C 71.63, H 5.23, N 13.32.

**2,2':6',2''-Terpyridine-3',5'-dicarboxylic acid hexylamide [tpy-(CONHC<sub>6</sub>H<sub>13</sub>)<sub>2</sub>]:** The procedure was similar to the preparation of tpy-(CONHPh)<sub>2</sub> except that *n*-hexylamine (0.42 ml, 3.20 mmol) was used in place of aniline to give the pure product as a white solid. Yield: 357 mg (47 %). <sup>1</sup>H NMR (400 MHz, CDCl<sub>3</sub>, 298 K,  $\delta$ /ppm):  $\delta$  0.87-0.92 (t,  $J = 6.8$  Hz, 6H, -CH<sub>3</sub>), 1.30-1.34 (m, 12H, -CH<sub>2</sub>-), 1.48-1.52 (m, 4H, -CH<sub>2</sub>-), 3.35-3.41 (q,  $J = 7.0$  Hz, 4H, -NHCH<sub>2</sub>-), 7.22

(br s, 2H, –CONH–), 7.32-7.37 (ddd,  $J = 1.4, 4.7, 7.7$  Hz, 2H, terpyridyl H), 7.80-7.85 (dt,  $J = 1.4, 7.7$  Hz, 2H, terpyridyl H), 8.04-8.06 (d,  $J = 7.7$  Hz, 2H, terpyridyl H), 8.15 (s, 1H, terpyridyl H), 8.55-8.56 (d,  $J = 4.7$  Hz, 2H, terpyridyl H); positive-ion FAB-MS,  $m/z$ : 488  $[M + H]^+$ ; elemental analysis calcd (%) for  $C_{29}H_{37}N_5O_2 \cdot 0.5MeOH$ : C 70.35, H 7.80, N 13.91; found: C 70.46, H 7.62, N 14.00.

### Syntheses of chloroplatinum(II) terpyridine complexes

**[Pt{tpy–(CONHPh)<sub>2</sub>}Cl]OTf**: This was synthesized by the modification of the literature procedure for the synthesis of  $[Pt(tpy)Cl]OTf^{[2-5]}$  using tpy–(CONHPh)<sub>2</sub> (150 mg, 0.32 mmol) in place of 2,2':6',2''-terpyridine. Subsequent recrystallization by diffusion of diethyl ether vapor into the acetonitrile solution of this precursor complex gave the pure product as a yellow solid. Yield: 220 mg (80 %). <sup>1</sup>H NMR (400 MHz, CD<sub>3</sub>CN, 298 K,  $\delta/ppm$ ):  $\delta$  7.27-7.31 (t,  $J = 7.6$  Hz, 2H, –C<sub>6</sub>H<sub>5</sub>NH–), 7.45-7.49 (t,  $J = 7.6$  Hz, 4H, –C<sub>6</sub>H<sub>5</sub>NH–), 7.74-7.76 (d,  $J = 7.6$  Hz, 4H, –C<sub>6</sub>H<sub>5</sub>NH–), 7.85-7.89 (dt,  $J = 1.7, 7.4$  Hz, 2H, terpyridyl H), 8.25-8.33 (m, 4H, terpyridyl H), 8.76 (s, 1H, terpyridyl H), 9.19-9.20 (d,  $J = 5.4$  Hz, 2H, terpyridyl H), 9.54 (br s, 2H, –C<sub>6</sub>H<sub>5</sub>NH–); IR (Nujol,  $\nu/cm^{-1}$ ): 1682 (m)  $\nu(C=O)$ , 1157 (s)  $\nu(S=O)$ ; positive-ion FAB-MS,  $m/z$ : 702  $[M - OTf]^+$ ; elemental analysis calcd (%) for  $C_{30}H_{21}ClF_3N_5O_5PtS \cdot H_2O$ : C 41.46, H 2.67, N 8.06; found: C 41.47, H 2.62, N 8.10.

**[Pt{tpy–(CONHC<sub>6</sub>H<sub>13</sub>)<sub>2</sub>}Cl]OTf**: The procedure was similar to that for the preparation of  $[Pt\{tpy-(CONHPh)_2\}Cl]OTf$  except that tpy–(CONHC<sub>6</sub>H<sub>13</sub>)<sub>2</sub> (156 mg, 0.32 mmol) was used in place of tpy–(CONHPh)<sub>2</sub> and subsequent recrystallization by diffusion of diethyl ether vapor into the dichloromethane solution of this precursor complex gave the pure product as an orange solid. Yield: 241 mg (87 %). <sup>1</sup>H NMR (400 MHz, CD<sub>3</sub>CN, 298 K,  $\delta/ppm$ ):  $\delta$  0.90-0.93 (t,  $J = 7.0$  Hz, 6H, –CH<sub>3</sub>), 1.33-1.43 (m, 12H, –CH<sub>2</sub>–), 1.62-1.69 (m, 4H, –CH<sub>2</sub>–), 3.46-3.50 (q,  $J = 7.0$  Hz, 4 H, –NHCH<sub>2</sub>–), 7.61 (br s, 2H, –CONH–), 7.82-7.86 (ddd,  $J = 1.4, 5.6, 7.8$  Hz, 2H, terpyridyl H), 8.15-8.17 (d,  $J = 7.8$  Hz, 2H, terpyridyl H), 8.27 (s, 1H, terpyridyl H), 8.27-8.33 (dt,  $J = 1.4, 7.8$  Hz, 2H, terpyridyl H), 9.11-9.13 (d,  $J = 5.6$  Hz, 2H, terpyridyl H); IR (Nujol,  $\nu/cm^{-1}$ ): 1659 (m)  $\nu(C=O)$ , 1157 (s)  $\nu(S=O)$ ; positive-ion FAB-MS,  $m/z$ : 718  $[M - OTf]^+$ ; elemental analysis calcd (%) for  $C_{30}H_{37}ClF_3N_5O_5PtS \cdot 1.5CH_2Cl_2$ : C 38.03, H 4.05, N 7.04; found: C 38.27, H 4.07, N 7.02.

### Syntheses of alkynylplatinum(II) terpyridine complexes

**[Pt{tpy-(CONHPh)<sub>2</sub>}(C≡CPh)]PF<sub>6</sub> (1):** This was synthesized according to the modification of a method previously reported for the alkynylplatinum(II) terpyridine complexes<sup>[6]</sup> except that [Pt{tpy-(CONHPh)<sub>2</sub>}Cl]OTf (200 mg, 0.23 mmol) and phenylacetylene (71 mg, 70 mmol) were used to give **1** as an orange solid. Yield: 131 mg (61 %). <sup>1</sup>H NMR (400 MHz, CD<sub>3</sub>CN, 298 K, δ/ppm): δ 7.27-7.32 (m, 3H, -C≡CC<sub>6</sub>H<sub>5</sub>), 7.35-7.39 (t, *J* = 7.6 Hz, 2H, -C<sub>6</sub>H<sub>5</sub>NH-), 7.45-7.49 (t, *J* = 7.6 Hz, 4H, -C<sub>6</sub>H<sub>5</sub>NH-), 7.53-7.59 (m, 2H, -C≡CC<sub>6</sub>H<sub>5</sub>), 7.74-7.76 (d, *J* = 7.6 Hz, 4H, -C<sub>6</sub>H<sub>5</sub>NH-), 7.82-7.85 (dt, *J* = 1.4, 7.3 Hz, 2H, terpyridyl H), 8.28-8.32 (m, 4H, terpyridyl H), 8.71 (s, 1H, terpyridyl H), 9.44 (br s, 2H, -C<sub>6</sub>H<sub>5</sub>NH-), 9.46-9.47 (d, *J* = 5.2 Hz, 2H, terpyridyl H); IR (Nujol, ν/cm<sup>-1</sup>): 2122 (w) ν(C≡C), 1682 (m) ν(C=O), 849 (s) ν(P-F); positive-ion FAB-MS, *m/z*: 767 [M - PF<sub>6</sub>]<sup>+</sup>; elemental analysis calcd (%) for C<sub>37</sub>H<sub>26</sub>F<sub>6</sub>N<sub>5</sub>O<sub>2</sub>PPt: C 48.69, H 2.87, N 7.67; found: C 48.63, H 2.91, N 7.90.

**[Pt{tpy-(CONHC<sub>6</sub>H<sub>13</sub>)<sub>2</sub>}(C≡CPh)]PF<sub>6</sub> (2):** The procedure was similar to that for the preparation of **1** except that [Pt{tpy-(CONHC<sub>6</sub>H<sub>13</sub>)<sub>2</sub>}Cl]OTf (200 mg, 0.23 mmol) was used in place of [Pt{tpy-(CONHPh)<sub>2</sub>}Cl]OTf to give **2** as a dark red solid. Yield: 120 mg (56 %). <sup>1</sup>H NMR (400 MHz, CD<sub>3</sub>CN, 298 K, δ/ppm): δ 0.90-0.94 (t, *J* = 7.0 Hz, 6H, -CH<sub>3</sub>), 1.34-1.43 (m, 12H, -CH<sub>2</sub>-), 1.62-1.69 (m, 4H, -CH<sub>2</sub>-), 3.46-3.50 (q, *J* = 6.6 Hz, 4H, -NHCH<sub>2</sub>-), 7.29-7.39 (m, 3H, -C<sub>6</sub>H<sub>5</sub>-), 7.50-7.53 (br s, 2H, -CONH-), 7.53-7.56 (m, 2H, -C<sub>6</sub>H<sub>5</sub>-), 7.79-7.83 (ddd, *J* = 1.3, 5.4, 7.8 Hz, 2H, terpyridyl H), 8.15-8.17 (d, *J* = 7.8 Hz, 2H, terpyridyl H), 8.22 (s, 1H, terpyridyl H), 8.28-8.32 (dt, *J* = 1.3, 7.8 Hz, 2H, terpyridyl H), 9.40-9.41 (d, *J* = 5.4 Hz, 2H, terpyridyl H); IR (Nujol, ν/cm<sup>-1</sup>): 2121 (w) ν(C≡C), 1659 (m) ν(C=O), 841 (s) ν(P-F); positive-ion FAB-MS, *m/z*: 783 [M - PF<sub>6</sub>]<sup>+</sup>; elemental analysis calcd (%) for C<sub>37</sub>H<sub>42</sub>F<sub>6</sub>N<sub>5</sub>O<sub>2</sub>PPt•MeOH: C 47.50, H 4.82, N 7.28; found: C 47.32, H 4.53, N 7.27.

**Physical measurements and instrumentation:** <sup>1</sup>H NMR spectra were recorded on a Bruker AVANCE 400 (400 MHz) Fourier transform NMR spectrometer at ambient temperature with tetramethylsilane (Me<sub>4</sub>Si) as an internal reference. Positive-ion fast atom bombardment (FAB) mass spectra were recorded on a Thermo Scientific DFS High Resolution Magnetic Sector mass spectrometer. Electrospray-ionization (ESI) mass spectra were obtained on a Finnigan LCQ mass spectrometer. Infrared (IR) spectra were recorded on a Bio-Rad FTS-7 Fourier transform infrared

spectrophotometer (4000–400  $\text{cm}^{-1}$ ). Elemental analyses were performed on a Flash EA 1112 elemental analyzer at the Institute of Chemistry of the Chinese Academy of Sciences, Beijing. UV-Vis absorption spectra were recorded on a Cary 50 (Varian) spectrophotometer equipped with a Xenon flash lamp. Steady state excitation and emission spectra were recorded using a Spex Fluorolog-3 Model FL3-211 fluorescence spectrofluorometer equipped with a R2658P PMT detector. All the emission spectra were corrected for PMT response. Emission lifetime measurements were performed using a conventional laser system. The excitation source used was a 355-nm output (third harmonic) of a Spectra-Physics Quanta-Ray Q-switched GCR-150-10 pulsed Nd-YAG laser. Luminescence decay signals were detected by a Hamamatsu R928 PMT and recorded on a Tektronix Model TDS-620A (500MHz, 2 GS/s) digital oscilloscope. The luminescence decay traces were analyzed using a program for single exponential fits. All solutions for emission lifetime studies were degassed on a high-vacuum line in a two-compartment cell consisting of a 10-ml Pyrex bulb and a 1-cm path length quartz cuvette and sealed from the atmosphere by a Bibby Rotaflo HP6 Teflon stopper. The solutions were rigorously degassed with at least four successive freeze-pump-thaw cycles.

**Binding constant determination:** Supporting electrolyte (0.1 M  ${}^n\text{Bu}_4\text{NPF}_6$ ) was added to maintain the ionic strength of the sample solution constant during the titration to avoid any changes in the ionic strength of the medium. The binding constants,  $K_s$ , of 1:1 host-guest complexation system were determined by a nonlinear least-squares fit<sup>[7]</sup> of the emission intensities ( $I$ ) against the concentration of guest added ( $C_G$ ) according to Equation (1):

$$I = I_0 + \frac{I_{\text{lim}} - I_0}{2C_0} [C_0 + C_G + 1/K_s - [(C_0 + C_G + 1/K_s)^2 - 4C_0C_G]^{1/2}] \quad (1)$$

where  $I_0$  and  $I$  are the emission intensities of the host at the wavelength of interest in the absence and presence of the guest, respectively;  $C_0$  is the concentration of host;  $I_{\text{lim}}$  is the limiting value of the emission intensity in the presence of excess amount of guest.

## References:

- [1] F. H. Case, W. A. Butte, *J. Org. Chem.* **1961**, 26, 4415 – 4418.

- [2] J. A. Bailey, M. G. Hill, R. E. Marsh, V. M. Miskowski, W. P. Schaefer, H. B. Gray, *Inorg. Chem.* **1995**, *34*, 4591 – 4599.
- [3] S. D. Cummings, R. Eisenberg, *Inorg. Chem.* **1995**, *34*, 2007 – 2014.
- [4] R. Büchner, J. S. Field, R. J. Haines, C. T. Cunningham, D. R. McMillin, *Inorg. Chem.* **1997**, *36*, 3952 – 3956.
- [5] M. Howe-Grant, S. J. Lippard, *Inorg. Synth.* **1980**, *20*, 101 – 105.
- [6] V. W. W. Yam, R. P. L. Tang, K. M. C. Wong, K. K. Cheung, *Organometallics* **2001**, *20*, 4476 – 4482.
- [7] J. Bourson, J. Pouget, B. Valeur, *J. Phys. Chem.* **1993**, *97*, 4552 – 4557.

**Table S1** Photophysical data for complexes **1** and **2**.

| Complex  | Medium<br>( <i>T</i> / K) | Absorption<br>$\lambda_{\text{abs}} / \text{nm}$ ( $\epsilon / \text{dm}^3 \text{mol}^{-1} \text{cm}^{-1}$ ) | Emission<br>$\lambda_{\text{em}} / \text{nm}$ ( $\tau / \mu\text{s}$ ) |
|----------|---------------------------|--------------------------------------------------------------------------------------------------------------|------------------------------------------------------------------------|
| <b>1</b> | CH <sub>3</sub> CN (298)  | 250 (56000), 297 (24890), 317 sh<br>(18080), 330 sh (15870), 344 sh<br>(14420), 445 (4050)                   | 662 (0.14)                                                             |
| <b>2</b> | CH <sub>3</sub> CN (298)  | 251 (42830), 286 sh (25140), 298<br>(25340), 318 sh (14380), 332 sh<br>(13180), 347 (13060), 444 (4420)      | 653 (0.20)                                                             |
|          | Acetone (298)             | 349 (11200), 445 (3730)                                                                                      | 652 (0.24)                                                             |

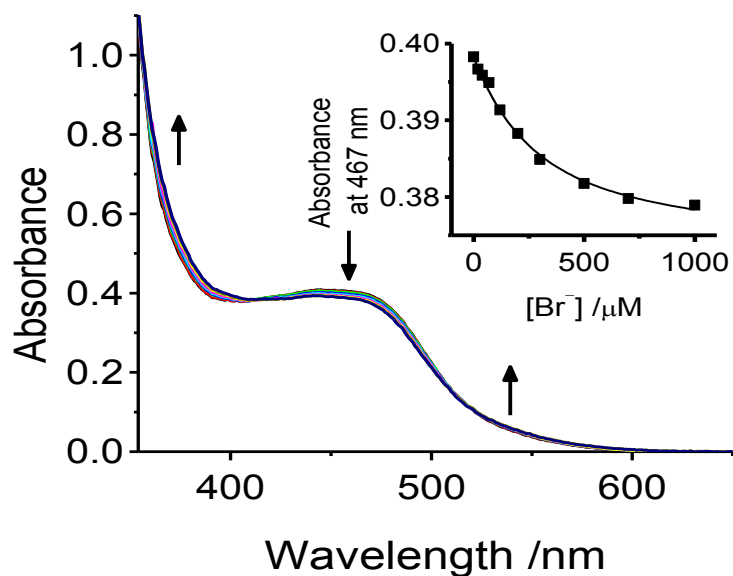**Figure S1** UV-Vis absorption spectral changes of **1** (100 μM) in acetonitrile (0.1 M <sup>n</sup>Bu<sub>4</sub>NPF<sub>6</sub>) upon addition of <sup>n</sup>Bu<sub>4</sub>NBr. Inset: plot of absorbance at 467 nm against various concentrations of Br<sup>-</sup> ion.

**Table S2** Emission lifetimes of **1** and **2** (100  $\mu\text{M}$ ) in the absence and in the presence of various anions (750  $\mu\text{M}$ ).

| Complex               | Anion          | $\tau / \mu\text{s}$ |
|-----------------------|----------------|----------------------|
| <b>1</b> <sup>a</sup> | None           | 0.12                 |
|                       | $\text{Cl}^-$  | < 0.05               |
|                       | $\text{Br}^-$  | < 0.05               |
| <b>2</b> <sup>b</sup> | None           | 0.20                 |
|                       | $\text{F}^-$   | – <sup>c</sup>       |
|                       | $\text{Cl}^-$  | < 0.05               |
|                       | $\text{Br}^-$  | 0.06                 |
|                       | $\text{I}^-$   | 0.07                 |
|                       | $\text{AcO}^-$ | < 0.05               |

<sup>a</sup> Measured in degassed acetonitrile (0.1 M <sup>n</sup>Bu<sub>4</sub>NPF<sub>6</sub>).

<sup>b</sup> Measured in degassed acetone (0.1 M <sup>n</sup>Bu<sub>4</sub>NPF<sub>6</sub>).

<sup>c</sup> Precipitations occurred upon degassing.



**Table S3** Binding constants ( $\log K_s$ ) and detection limits of **1** and **2** for various anions.

| Complex              | Anion                                       | Log $K_s$      |                | Detection Limit<br>/ $\mu\text{M}$ |
|----------------------|---------------------------------------------|----------------|----------------|------------------------------------|
|                      |                                             | UV-Vis         | Emission       |                                    |
| <b>1<sup>a</sup></b> | F <sup>-</sup>                              | – <sup>c</sup> | – <sup>c</sup> | – <sup>e</sup>                     |
|                      | Cl <sup>-</sup>                             | – <sup>d</sup> | 4.46 ± 0.05    | 9.86                               |
|                      | Br <sup>-</sup>                             | – <sup>d</sup> | 3.69 ± 0.05    | 18.35                              |
|                      | I <sup>-</sup>                              | – <sup>d</sup> | – <sup>d</sup> | – <sup>e</sup>                     |
|                      | AcO <sup>-</sup>                            | – <sup>c</sup> | – <sup>c</sup> | – <sup>e</sup>                     |
|                      | H <sub>2</sub> PO <sub>4</sub> <sup>-</sup> | – <sup>c</sup> | – <sup>c</sup> | – <sup>e</sup>                     |
| <b>2<sup>b</sup></b> | F <sup>-</sup>                              | – <sup>e</sup> | 4.15 ± 0.04    | 7.72                               |
|                      | Cl <sup>-</sup>                             | 4.03 ± 0.04    | 4.08 ± 0.01    | 12.67                              |
|                      | Br <sup>-</sup>                             | – <sup>d</sup> | 3.64 ± 0.01    | 16.96                              |
|                      | I <sup>-</sup>                              | – <sup>d</sup> | 3.41 ± 0.01    | 23.09                              |
|                      | AcO <sup>-</sup>                            | 4.40 ± 0.04    | 4.40 ± 0.08    | 5.75                               |
|                      | H <sub>2</sub> PO <sub>4</sub> <sup>-</sup> | – <sup>c</sup> | – <sup>c</sup> | – <sup>e</sup>                     |

<sup>a</sup> Measured in acetonitrile (0.1 M <sup>n</sup>Bu<sub>4</sub>NPF<sub>6</sub>).

<sup>b</sup> Measured in acetone (0.1 M <sup>n</sup>Bu<sub>4</sub>NPF<sub>6</sub>).

<sup>c</sup> Precipitations occurred upon anion addition.

<sup>d</sup> Spectral changes were too small for accurate determination of  $\log K_s$ .

<sup>e</sup> Not determined.

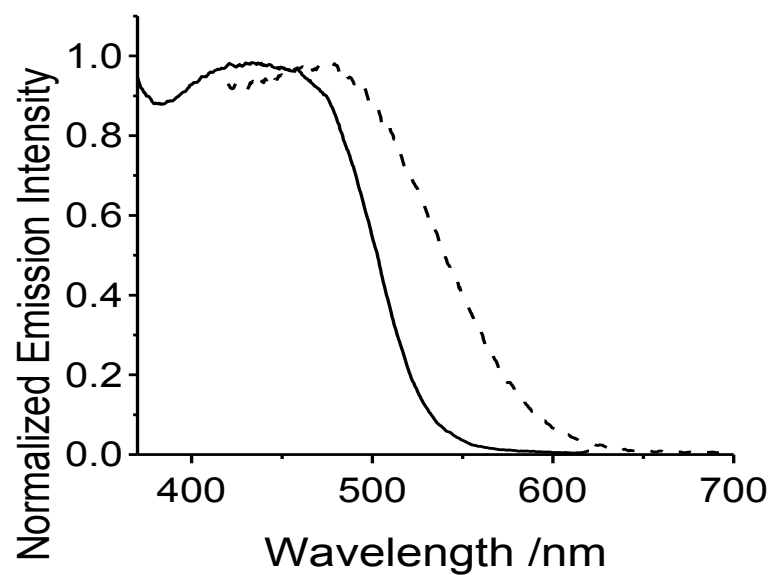

**Figure S2** Excitation spectra of **2** (100  $\mu$ M) in acetone (0.1 M  $n$ Bu<sub>4</sub>NPF<sub>6</sub>) in the absence (solid line) and in the presence of F<sup>-</sup> ion (7 equiv.) (dashed line), monitored at 653 and 750 nm, respectively.

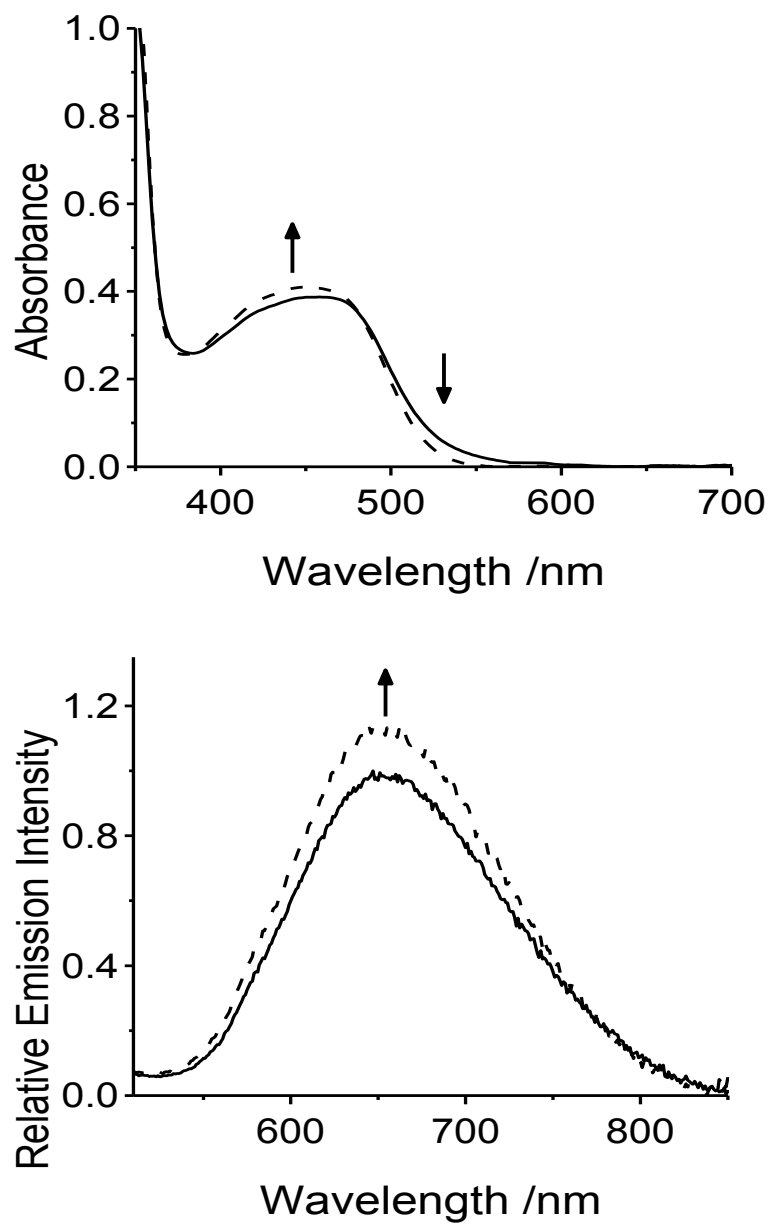

**Figure S3** (Top) UV-Vis absorption and (bottom) emission spectral changes of **2** (100  $\mu$ M) (solid line) in acetone (0.1 M  $n$ Bu<sub>4</sub>NPF<sub>6</sub>) in the presence of trifluoroacetic acid (4 equiv.) (dashed line).

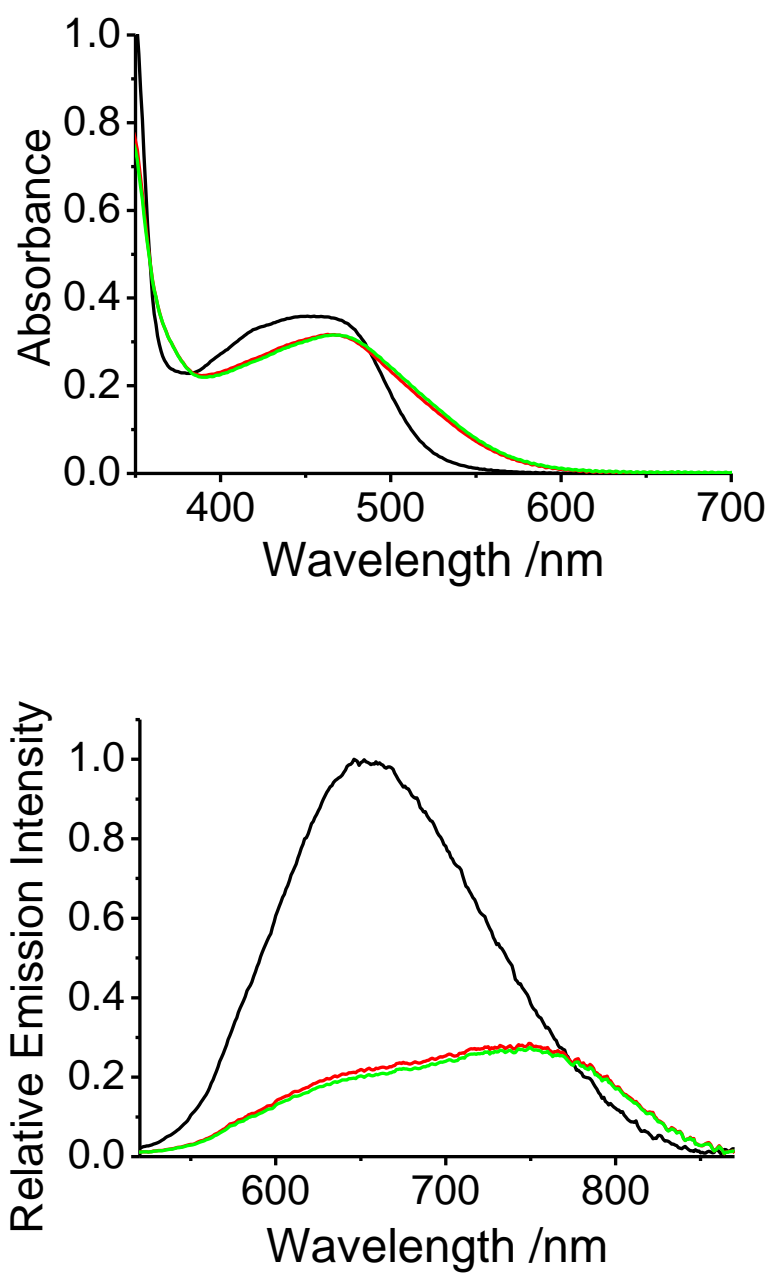

**Figure S4** (Top) UV-Vis absorption and (bottom) emission spectral changes of **2** (100  $\mu\text{M}$ ) (black line) in acetone (0.1 M  $n\text{Bu}_4\text{NPF}_6$ ) in the presence of  $n\text{Bu}_4\text{NF}$  (4 equiv.) (red line), and in the mixture in the presence of  $\text{CF}_3\text{COONa}$  (4 equiv.) (green line).

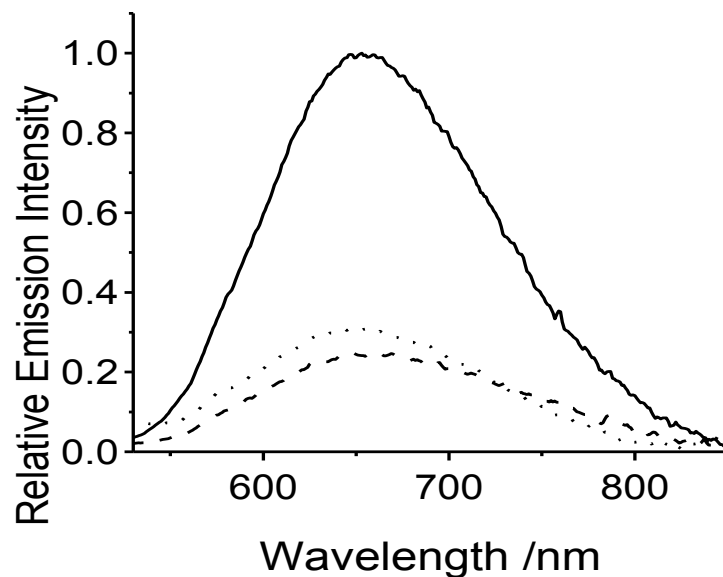

**Figure S5** Emission spectral changes of **2** (100  $\mu\text{M}$ ) (solid line) in acetone (0.1 M  ${}^n\text{Bu}_4\text{NPF}_6$ ) in the presence of  ${}^n\text{Bu}_4\text{NCl}$  (5 equiv.) (dashed line), and in the mixture in the presence of trifluoroacetic acid (5 equiv.) (dotted line).

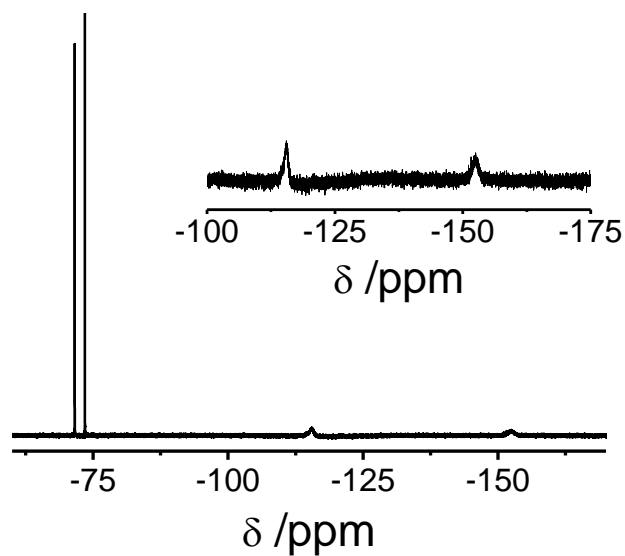

**Figure S6**  ${}^{19}\text{F}$  NMR spectrum and the expanded region from  $\delta$  -100 ppm to  $\delta$  -175 ppm of **2** in the presence of an excess of  ${}^n\text{Bu}_4\text{NF}$  in  $\text{D}^6$ -acetone.

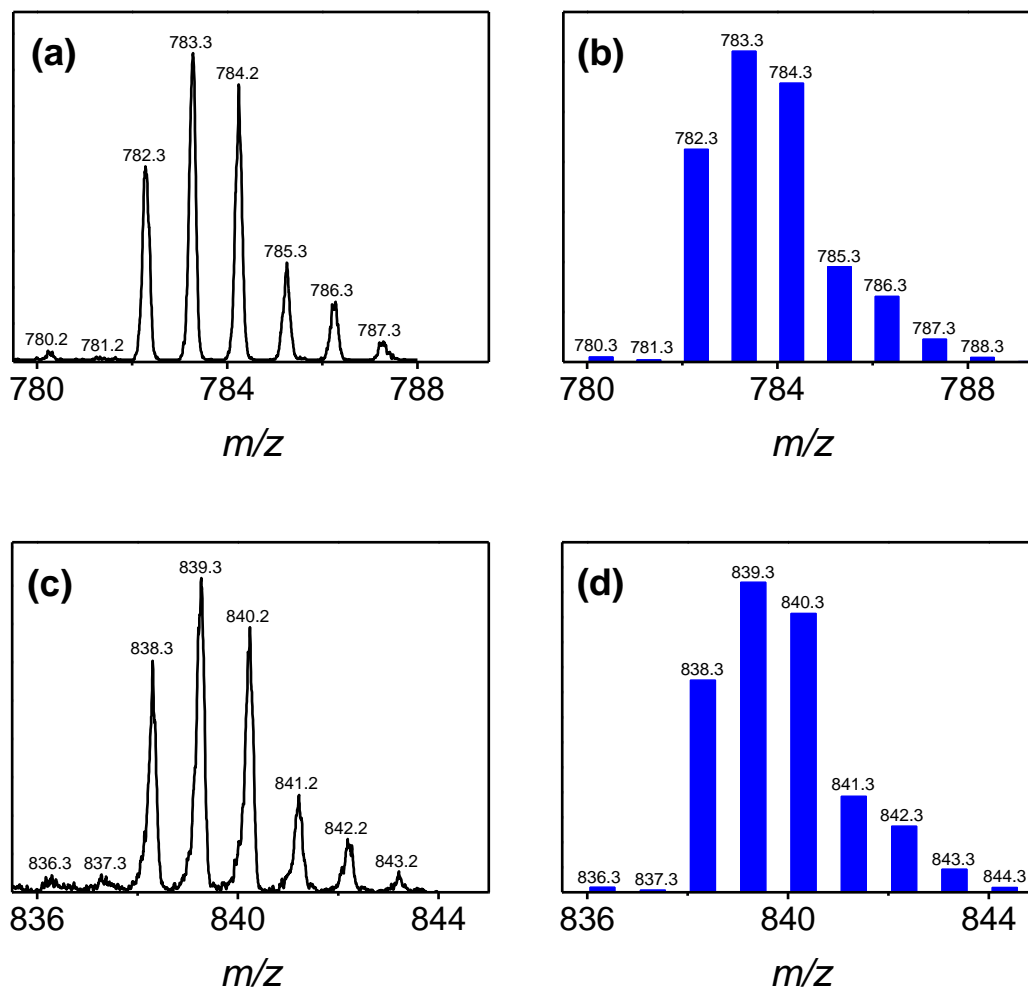

**Figure S7** (a) Expanded ion cluster at  $m/z$  783 from positive ESI-mass spectrum, prepared in acetone, and (b) simulated isotope pattern for **2**,  $[M - PF_6]^+$ . (c) Expanded ion cluster at  $m/z$  839 from negative ESI-mass spectrum and (d) simulated isotope pattern for the ion-bound adduct of **2** in acetone in the presence of  $F^-$  ion (6 equiv.),  $[M - PF_6 + 2F + H_2O]^-$ .

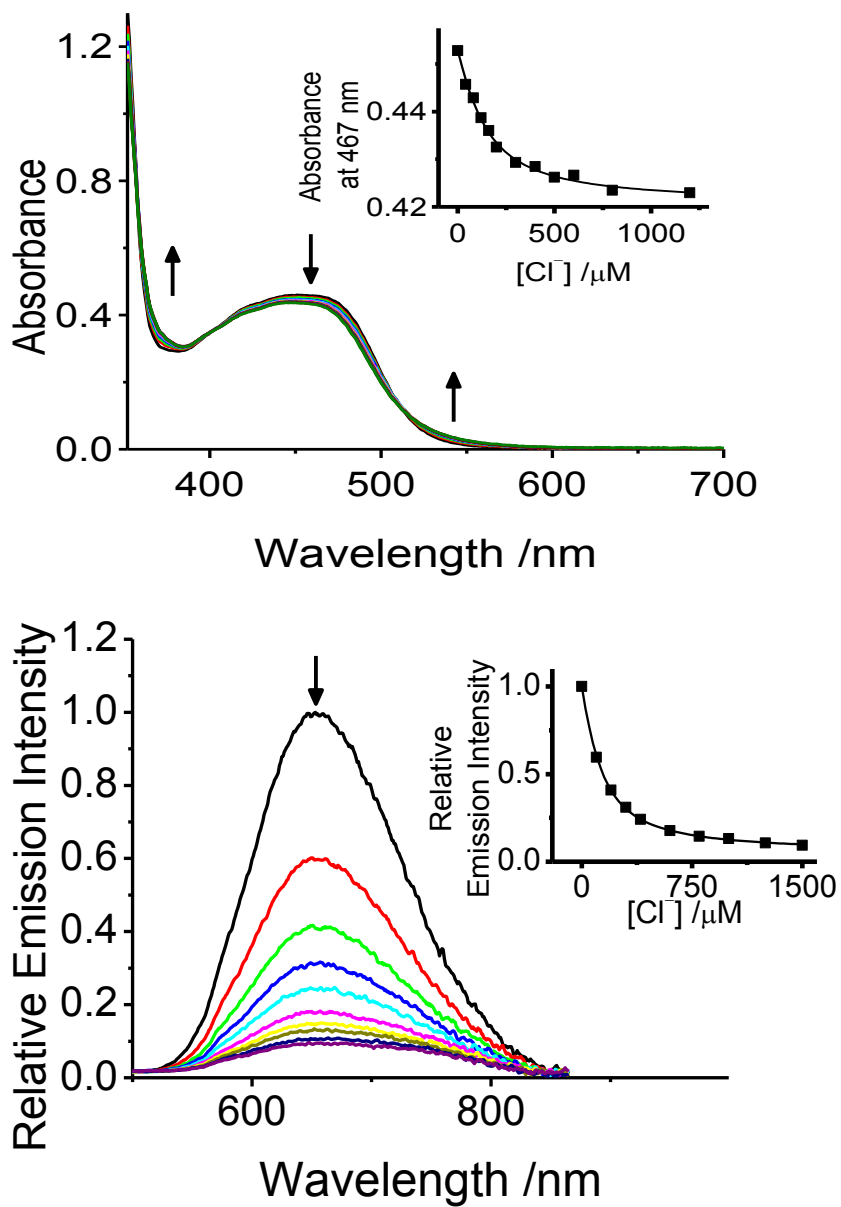

**Figure S8** (Top) UV-Vis absorption and (bottom) emission spectral changes of **2** (100 μM) in acetone (0.1 M  $n\text{Bu}_4\text{NPF}_6$ ) upon addition of  $n\text{Bu}_4\text{NCl}$ . Insets: plot of absorbance at 467 nm and relative emission intensity at 653 nm against various concentrations of  $\text{Cl}^-$  ion and their theoretical fit for 1:1 binding stoichiometry.

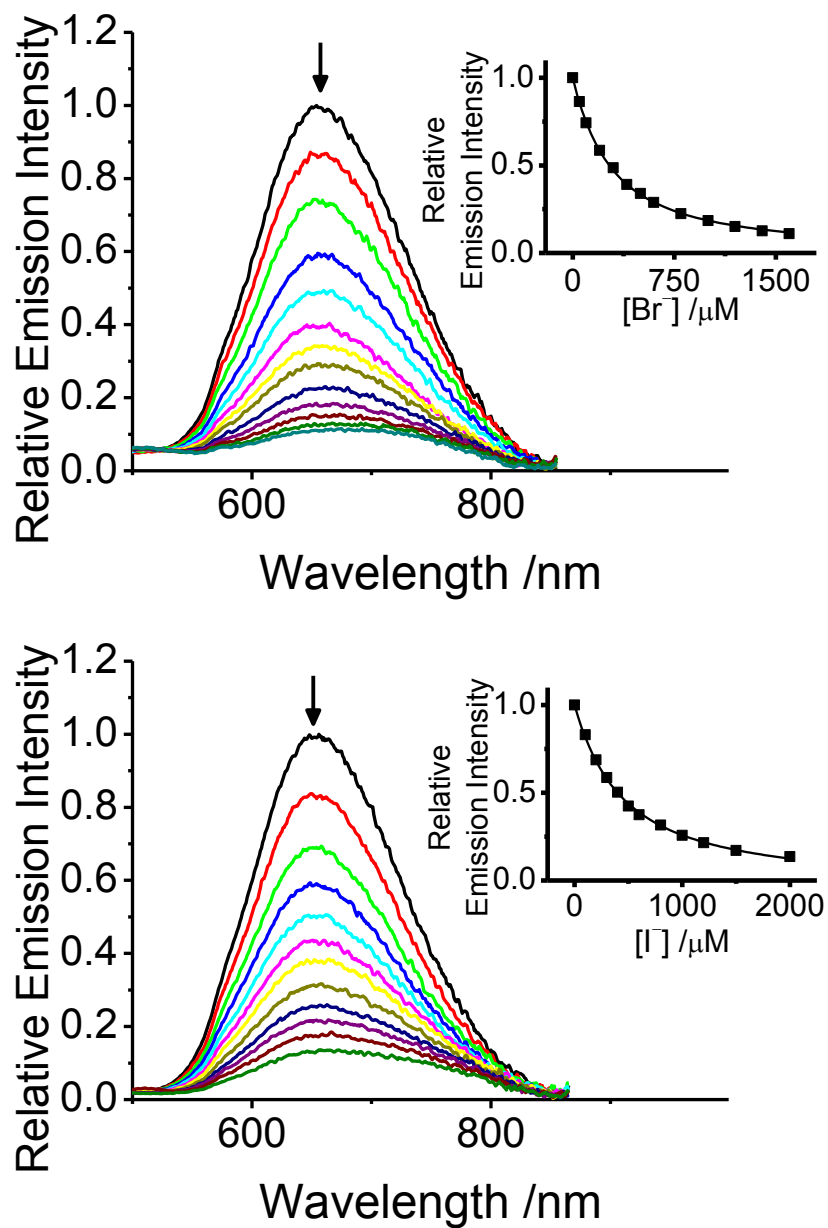

**Figure S9** Emission spectral changes of **2** (100  $\mu\text{M}$ ) in acetone (0.1 M  $t\text{Bu}_4\text{NPF}_6$ ) upon addition of (top)  $t\text{Bu}_4\text{NBr}$  and (bottom)  $t\text{Bu}_4\text{NI}$ . Insets: plot of relative emission intensity at 653 nm against various concentrations of  $\text{Br}^-$  and  $\text{I}^-$  ions and their theoretical fit for 1:1 binding stoichiometry.
